# Supplementary material for: Oxygen enriched porous carbon nanoflakes enable high-performance zinc ion hybrid capacitors
Source: Royal Society of Chemistry journal article supplement (doi:10.1039/d4se00992d), 2024-01-01
Supplement: d4se00992d1.pdf [file d4se00992d1.pdf]

Supplementary information for  
**Oxygen enriched porous carbon nanoflakes enable high-performance zinc ion  
hybrid capacitors**

Taiyu Cao, Chunliu Zhu\*, Xinyu Wang, Zhaowei Ji, Huanyu Liang, Jing Shi, Weiqian Tian, Jingwei Chen, Jingyi Wu, Huanlei Wang\*

School of Materials Science and Engineering, Ocean University of China, Qingdao 266100, China.

\*Corresponding author.

E-mail: huanleiwang@ouc.edu.cn, 1339724402@qq.com;

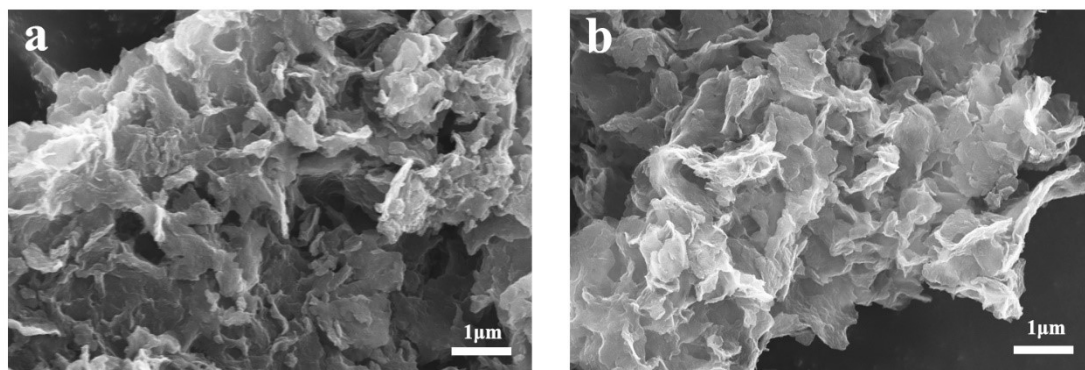

**Fig. S1** SEM images of (a) PCNs-700 and (b) PCNs-900.

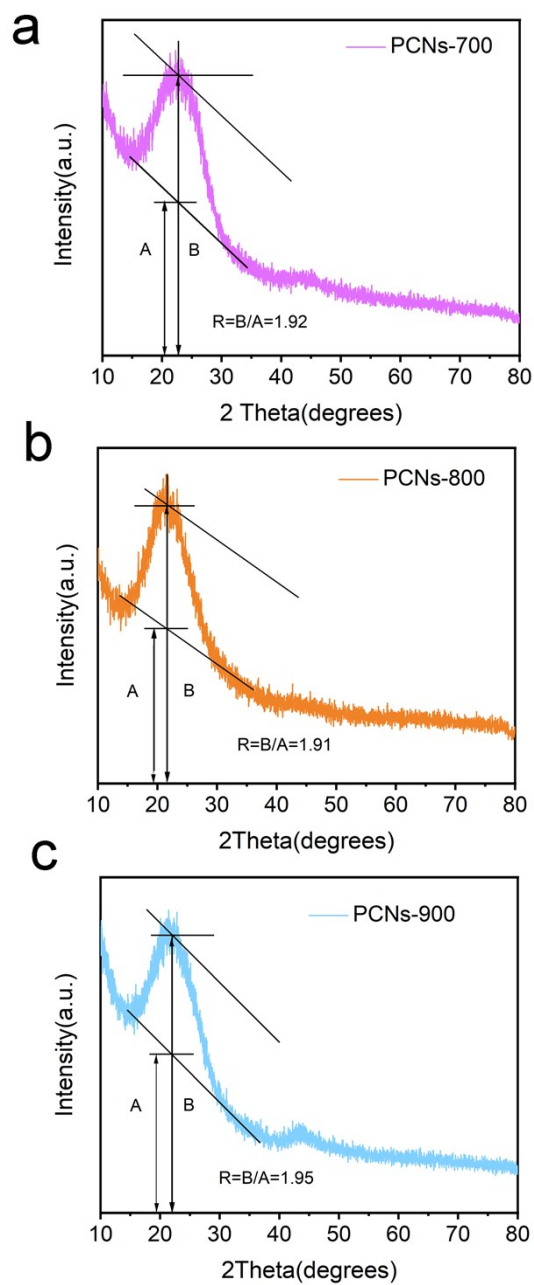

**Fig. S2** XRD patterns of (a) PCNs-700, (b) PCNs-800, and (c) PCNs-900.

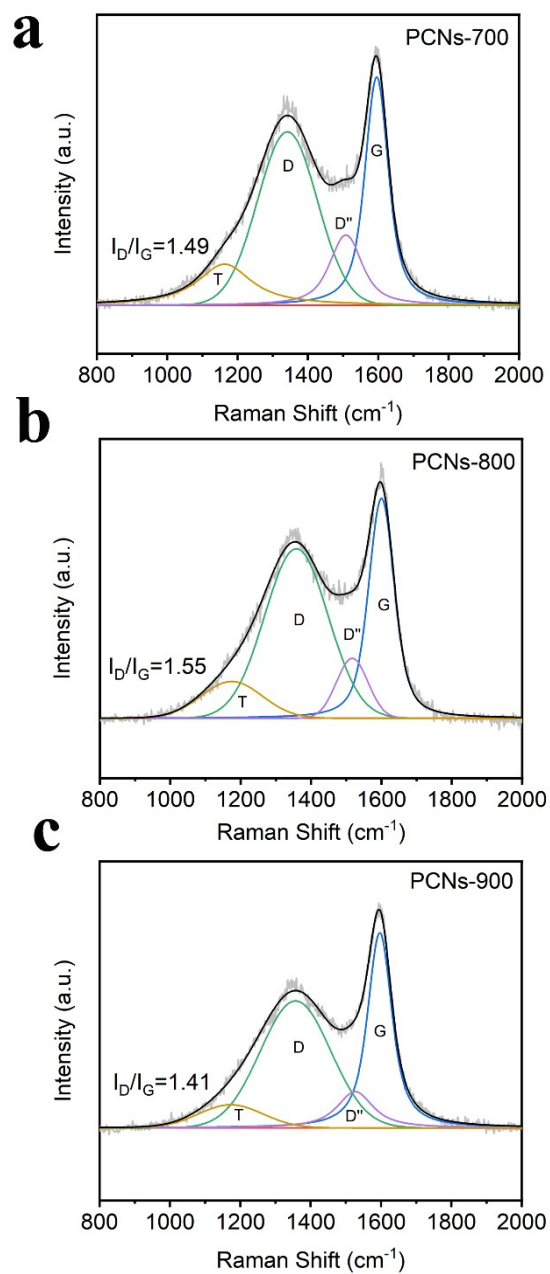

**Fig. S3** Raman spectra of (a) PCNs-700, (b) PCNs-800, and (c) PCNs-900.

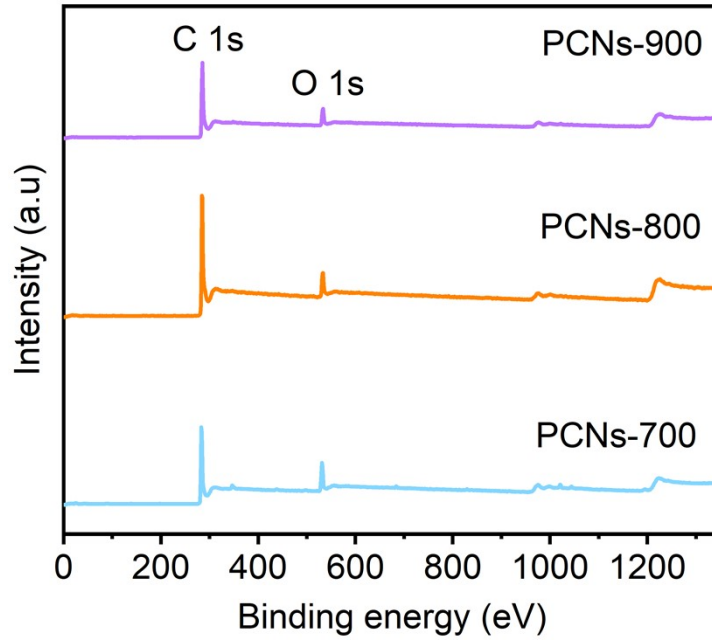

**Fig. S4** XPS survey spectra of PCNs-700, PCNs-800, and PCNs-900.

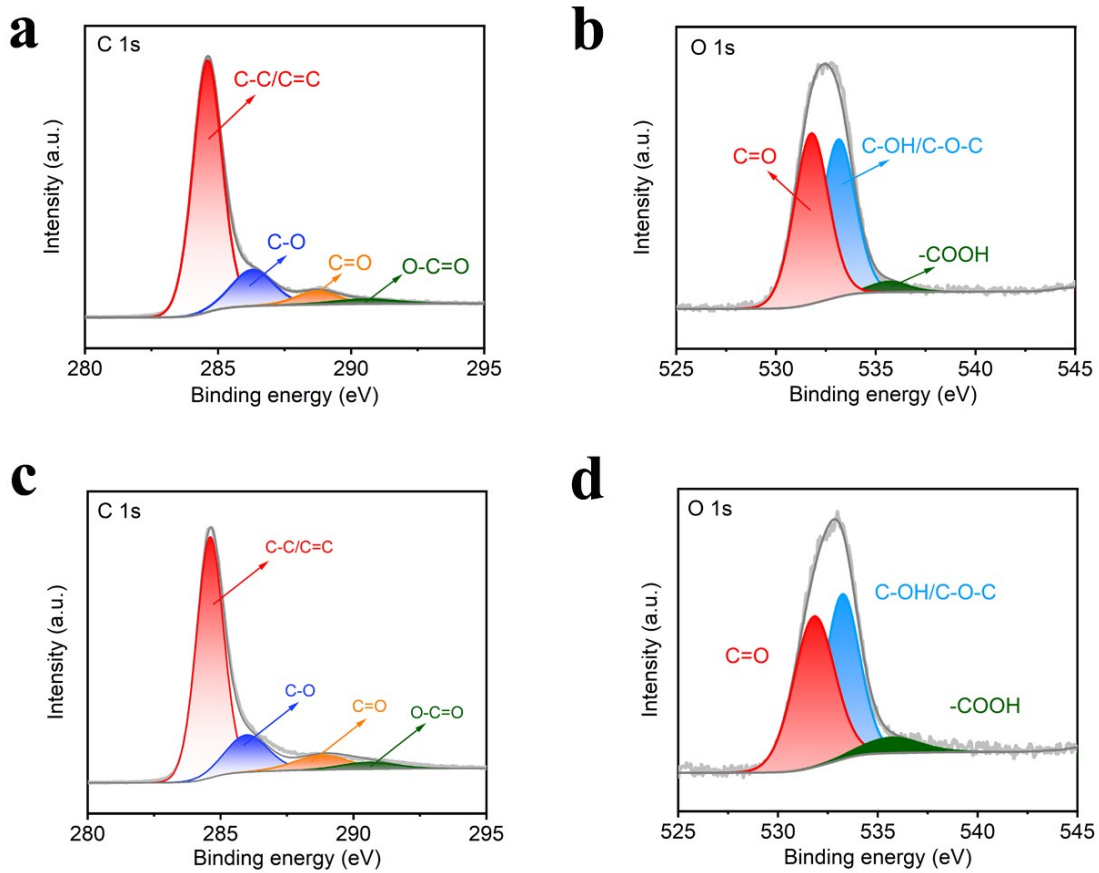

**Fig. S5** High resolution (a) C 1s and (b) O 1s spectra of PCNs-700; High resolution (c) C 1s spectra and (d) O 1s spectra of PCNs-900.

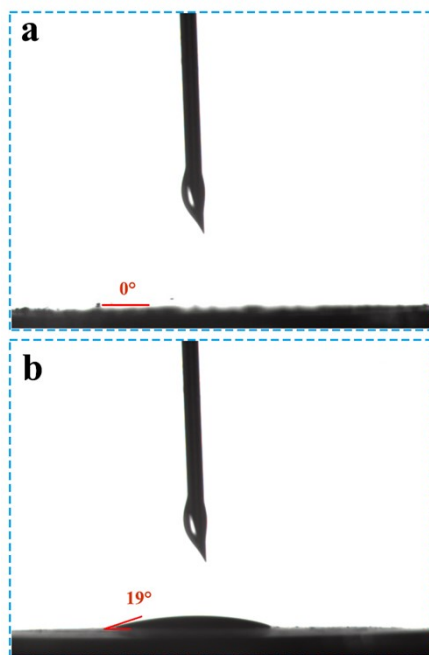

**Fig. S6** Water contact angles of (a) PCNs-800, and (b) commercial activated carbon (YP-50F).

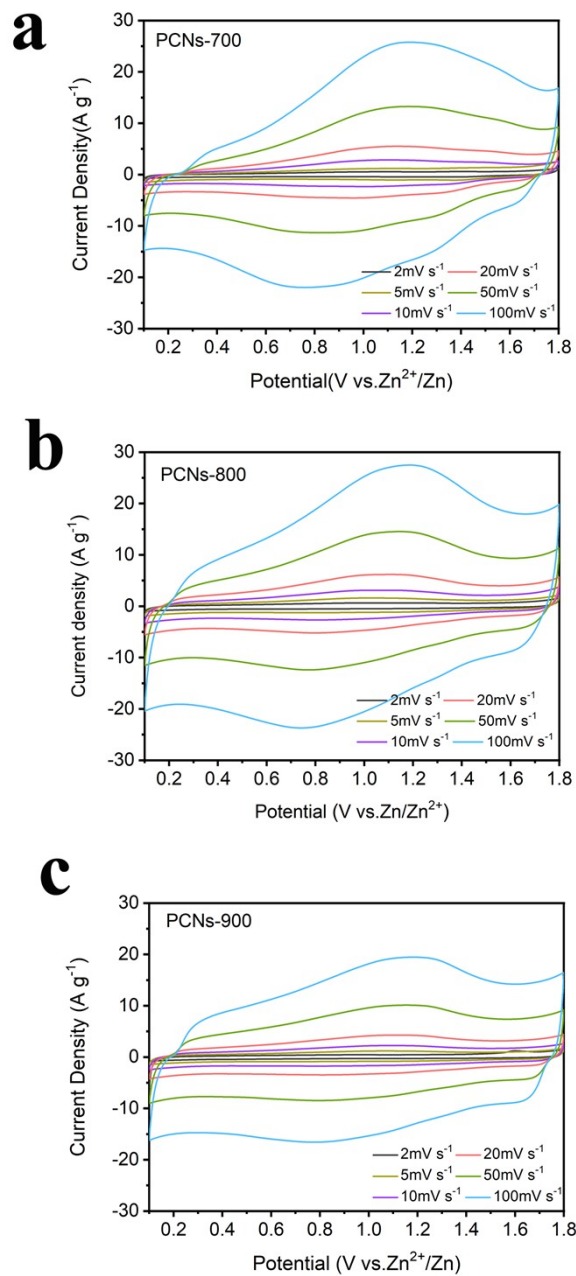

**Fig. S7** CV curves of (a) PCNs-700, (b) PCNs-800, and (c) PCNs-900 based ZIHCs at scan rates range of 2-100  $\text{mV}\cdot\text{s}^{-1}$ .

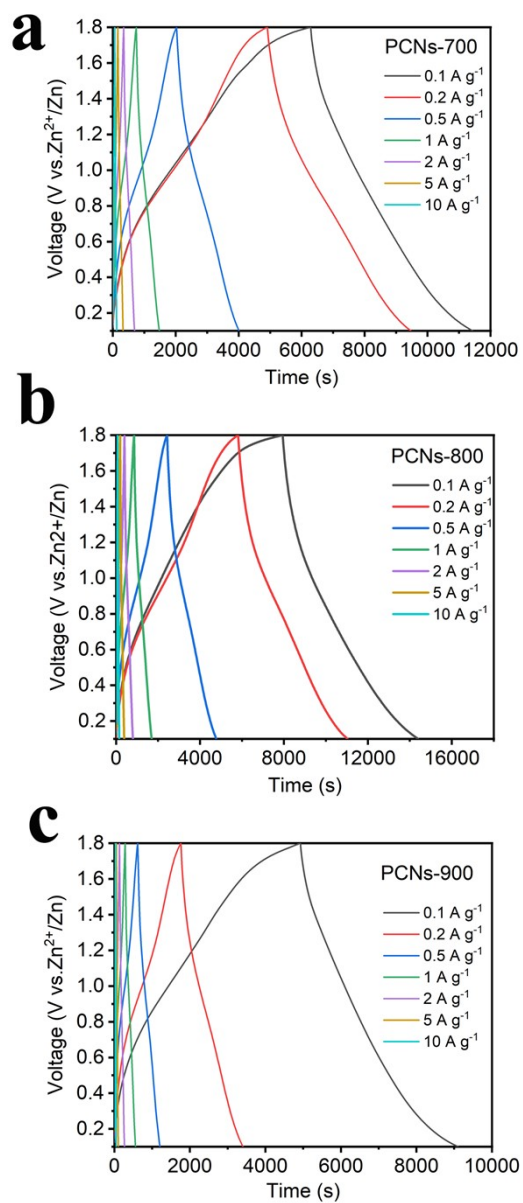

**Fig. S8** Galvanostatic charge–discharge profiles at 0.1–10  $\text{A g}^{-1}$  for (a) PCNs-700, (b) PCNs-800, and (c) PCNs-900.



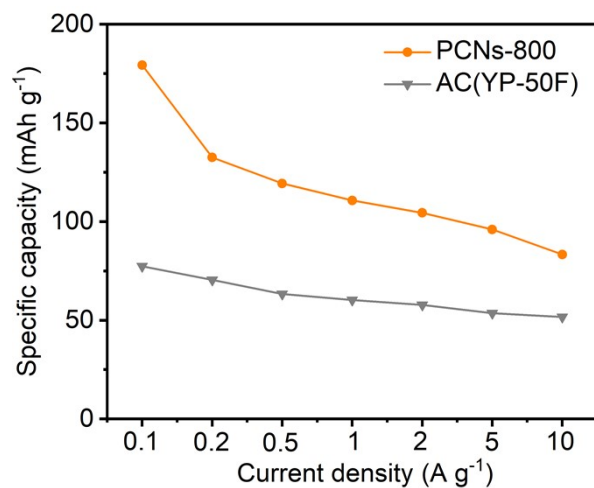

**Fig. S9** Comparison for rate capability between PCNs-800 cathode and commercial activated carbon (YP-50F).

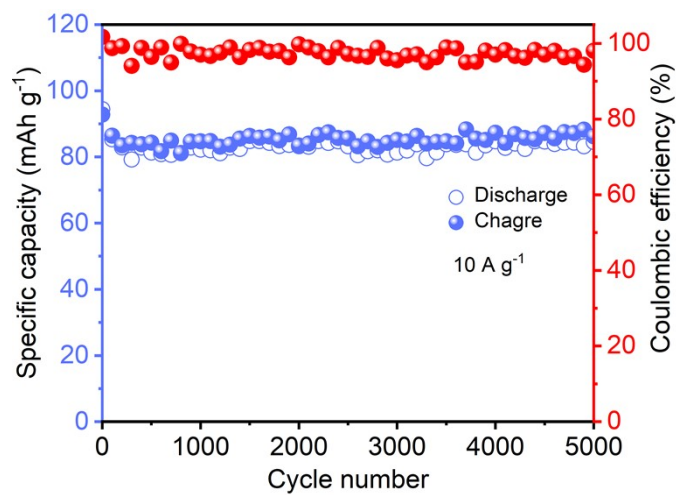

**Fig. S10** Cyclic performance of PCNs-800 at 10 A g<sup>-1</sup>.

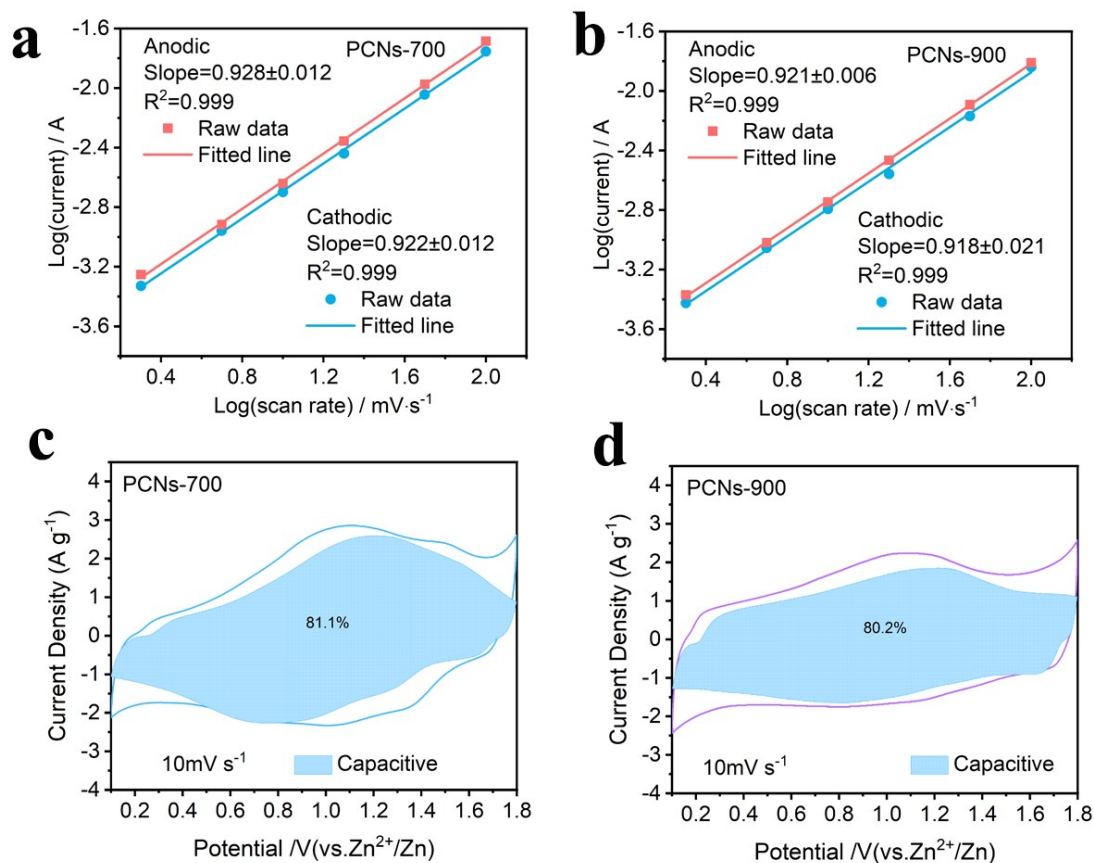

**Fig. S11** Selected cathodic and anodic  $b$  values of peak currents for (a) PCNs-700, and (b) PCNs-900; Capacitive contribution of (c) PCNs-700 and (d) PCNs-900 cathodes-based ZIHCs at 10  $mV s^{-1}$ .

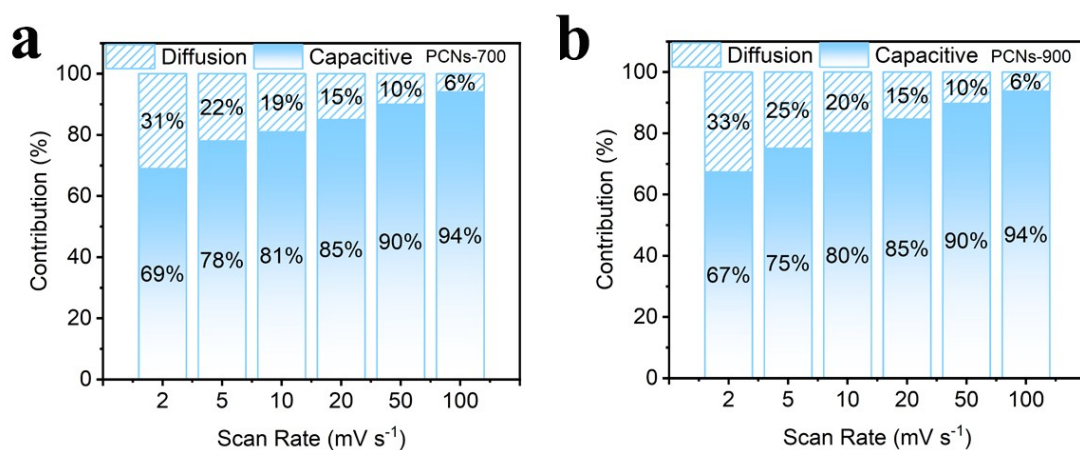

**Fig. S12** Capacitive/diffusion contribution ratios of (a) PCNs-700 and (b) PCNs-900 at different scan rates.

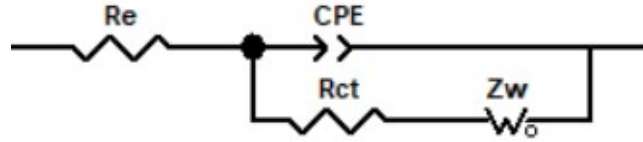

**Fig. S13** The corresponding simulating equivalent circuit.

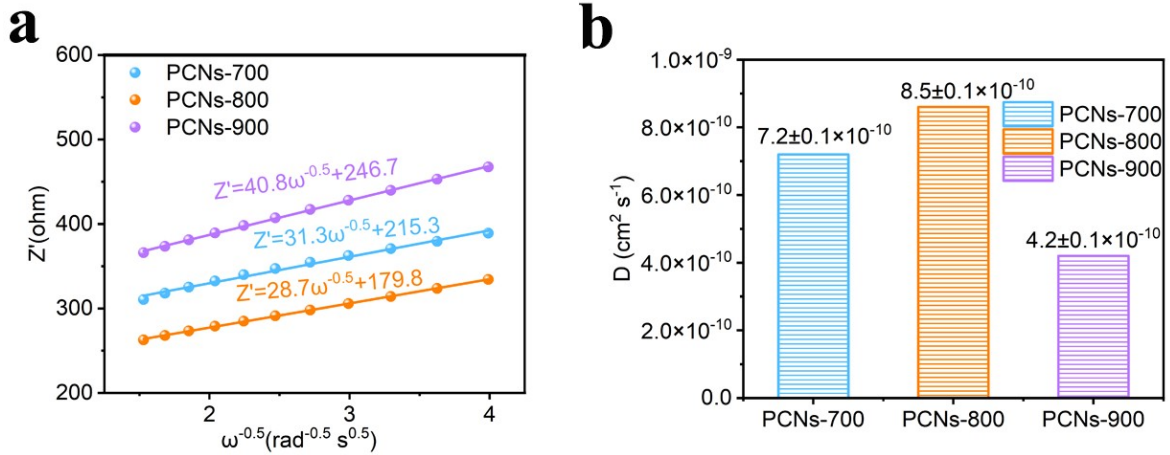

**Fig. S14** (a) Linear plots of real resistances ( $Z'$ ) against angular frequencies ( $\omega^{-0.5}$ ) in the low-frequency region for PCNs-700, PCNs-800, and PCNs-900, respectively. (b) Ion diffusion coefficients of PCNs-700, PCNs-800, and PCNs-900.

The diffusion coefficient of ions could be calculated by the EIS technique based on the following formulas<sup>1-3</sup>:

$$Z' = \sigma \omega^{-0.5} + R_e + R_{ct} \quad (S1)$$

$$D_{Zn^{2+}} = \frac{R^2 T^2}{2A^2 F^4 C^2 n^4 \sigma^2} \quad (S2)$$

where  $Z'$  is real part of impedance ( $\Omega$ ),  $\omega$  is angle frequency ( $\text{rad s}^{-1}$ ),  $\sigma$  is diffusion resistance ( $\Omega \text{ s}^{-0.5}$ ),  $R_e$  is ohmic resistance between the electrode and electrolyte ( $\Omega$ ),  $R_{ct}$  is charge transfer resistance ( $\Omega$ ),  $n$  is electron transfer numbers per molecule during electron reaction,  $D$  is ion diffusion coefficient ( $\text{cm}^2 \text{ s}^{-1}$ ),  $A$  is the surface area of electrode ( $\text{cm}^2$ ),  $R$  is gas constant ( $8.314 \text{ J mol}^{-1} \text{ K}^{-1}$ ),  $T$  is Kelvin temperature ( $293.15 \text{ K}$ ),  $C$  is molar concentration of electrolyte ( $\text{mol L}^{-1}$ ), and  $F$  is Faraday constant ( $96485 \text{ C mol}^{-1}$ ).

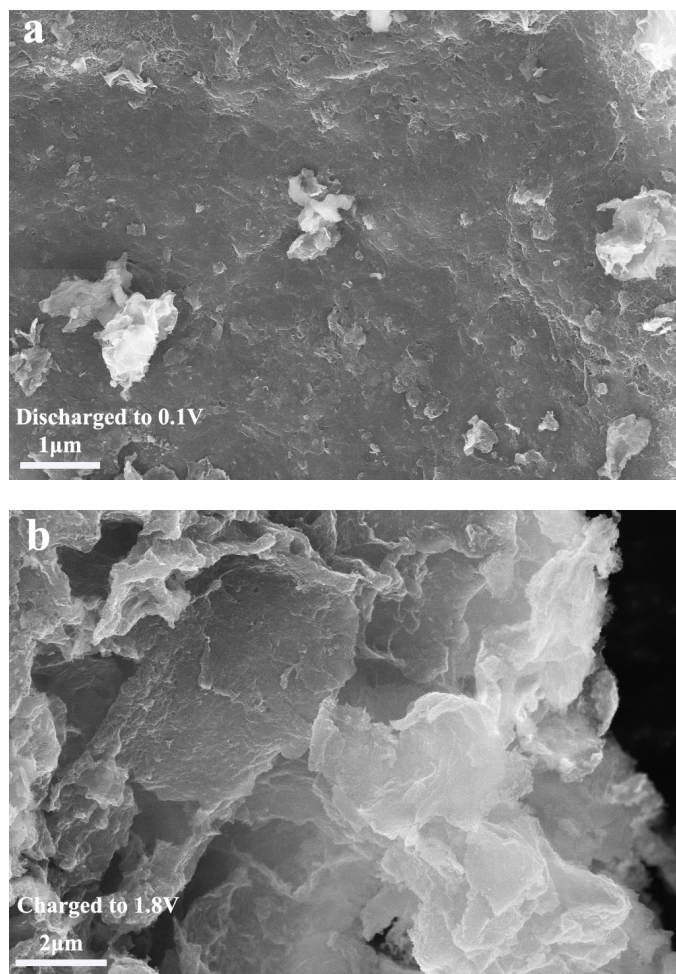

**Fig. S15** *Ex-situ* SEM of PCNs-800 electrode at (a) discharged and (b) charged states.

**Table S1** Physical and chemical parameters for PCNs-700, PCNs-800, and PCNs-900.

| Samples  | $R$  | $I_D/I_G$ | $S_{BET}^a$<br>( $m^2 g^{-1}$ ) | $V_t^b$<br>( $cm^3 g^{-1}$ ) | Pore volume (%) |       | XPS composition (at%) |      |
|----------|------|-----------|---------------------------------|------------------------------|-----------------|-------|-----------------------|------|
|          |      |           |                                 |                              | V<2nm           | V>2nm | C                     | O    |
| PCNs-700 | 1.92 | 1.5       | 757                             | 1.13                         | 14              | 86    | 86.5                  | 13.5 |
| PCNs-800 | 1.91 | 1.6       | 1134                            | 1.41                         | 15              | 85    | 81.0                  | 19.0 |
| PCNs-900 | 1.95 | 1.4       | 532                             | 1.03                         | 6               | 94    | 91.2                  | 8.8  |

a) Surface area was calculated by BET method;

b) The total pore volume was determined by DFT method

**Table S2** Specific capacities of PCNs-800 and other reported cathode materials for ZIHCs.

| Cathode<br>(Specific surface<br>area ) | Low rate<br>specific capacity            | High rate<br>specific capacity       | Mass loading          | Ref.      |
|----------------------------------------|------------------------------------------|--------------------------------------|-----------------------|-----------|
| PCNs-800<br>(1134 $m^2 g^{-1}$ )       | 179 mAh $g^{-1}$<br>at 0.1 A $g^{-1}$    | 83 mAh $g^{-1}$<br>at 10 A $g^{-1}$  | $\sim 1.0 mg cm^{-2}$ | This Work |
| SOCN-10<br>(1877 $m^2 g^{-1}$ )        | 151 mAh $g^{-1}$<br>at 0.1 A $g^{-1}$    | 80 mAh $g^{-1}$<br>at 10 A $g^{-1}$  | -                     | 3         |
| PHC3<br>(1469.3 $m^2 g^{-1}$ )         | 149 mAh $g^{-1}$<br>at 0.1 A $g^{-1}$    | 88 mAh $g^{-1}$<br>at 10 A $g^{-1}$  | $\sim 2.3 mg cm^{-2}$ | 4         |
| S-O-PC-HB<br>(818.17 $m^2 g^{-1}$ )    | 107.5 mAh $g^{-1}$<br>at 0.2 A $g^{-1}$  | 14 mAh $g^{-1}$<br>at 10 A $g^{-1}$  | $\sim 1.0 mg cm^{-2}$ | 5         |
| Zn-MET-800<br>(651.6 $m^2 g^{-1}$ )    | 164 mAh $g^{-1}$<br>at 0.1 A $g^{-1}$    | 64 mAh $g^{-1}$<br>at 10 A $g^{-1}$  | 1.5-2.0 $mg cm^{-2}$  | 6         |
| PCN-6<br>(1267.29 $m^2 g^{-1}$ )       | 120 mAh $g^{-1}$<br>at 0.1 A $g^{-1}$    | 76 mAh $g^{-1}$<br>at 10 A $g^{-1}$  | 1-2 $mg cm^{-2}$      | 7         |
| NPC<br>(1197.91 $m^2 g^{-1}$ )         | 158.2 mAh $g^{-1}$<br>at 0.25 A $g^{-1}$ | 85 mAh $g^{-1}$<br>at 10 A $g^{-1}$  | $\sim 2.0 mg cm^{-2}$ | 8         |
| PSR-4<br>(2072 $m^2 g^{-1}$ )          | 88 mAh $g^{-1}$<br>at 0.1 A $g^{-1}$     | 58.1 mAh $g^{-1}$<br>at 5 A $g^{-1}$ | $\sim 1.4 mg cm^{-2}$ | 9         |

**Table S3** The ion diffusion resistance ( $\sigma$ ) and ion diffusion coefficient (D) of PCNs-

700, PCNs-800, and PCNs-900 (Average of three test).

| Samples  | ion diffusion resistance ( $\sigma$ )/ $\Omega \text{ s}^{-0.5}$ | ion diffusion coefficient (D)/ $\text{cm}^2 \text{ s}^{-1}$ |
|----------|------------------------------------------------------------------|-------------------------------------------------------------|
| PCNs-700 | 31.3 $\pm$ 0.1                                                   | (7.2 $\pm$ 0.1) $\times 10^{-10}$                           |
| PCNs-800 | 28.7 $\pm$ 0.1                                                   | (8.5 $\pm$ 0.1) $\times 10^{-10}$                           |
| PCNs-900 | 40.8 $\pm$ 0.1                                                   | (4.2 $\pm$ 0.1) $\times 10^{-10}$                           |

## Reference

1. W. Jian, W. Zhang, X. Wei, B. Wu, W. Liang, Y. Wu, J. Yin, K. Lu, Y. Chen, H. N.

- Alshareef and X. Qiu, *Advanced Functional Materials*, 2022, **32**, 2209914.
2. H. Ma, H. Chen, M. Wu, F. Chi, F. Liu, J. Bai, H. Cheng, C. Li and L. Qu, *Angewandte Chemie International Edition*, 2020, **59**, 14541-14549.
  3. C. Zhu, R. Long, L. Zhu, W. Zou, Y. Zhang, Z. Gao, J. Shi, W. Tian, J. Wu and H. Wang, *Journal of Colloid and Interface Science*, 2023, **652**, 590-598.
  4. Y. Zeng, F. Wei, Q. Liu, Y. Gao, S. Gao and Y. Lv, *Journal of Alloys and Compounds*, 2023, **963**, 171233.
  5. K. Ning, M. Wei, Z. Jiang, T. Jiang, G. Zhao, L. Han, G. Zhu and Y. Zhu, *Materials Letters*, 2024, **355**, 135316.
  6. D. Jia, Z. Shen, W. Zhou, Y. Li, J. He, L. Jiang, Y. Wei and X. He, *Chemical Engineering Journal*, 2024, **485**, 149820.
  7. X. Zhang, J. Zhang, H. Zhang, L. Sun and Y. Zhang, *Journal of Energy Storage*, 2024, **92**, 112002.
  8. C. Liu, X. Chang, H. Mi, F. Guo, C. Ji and J. Qiu, *Carbon*, 2024, **216**, 118523.
  9. Z. Sun, X. Jiao, S. Chu and Z. Li, *ChemistrySelect*, 2023, **8**, e202304071.
